# Supplementary material
Source: PubMed Central journal article supplement (PMC384722)

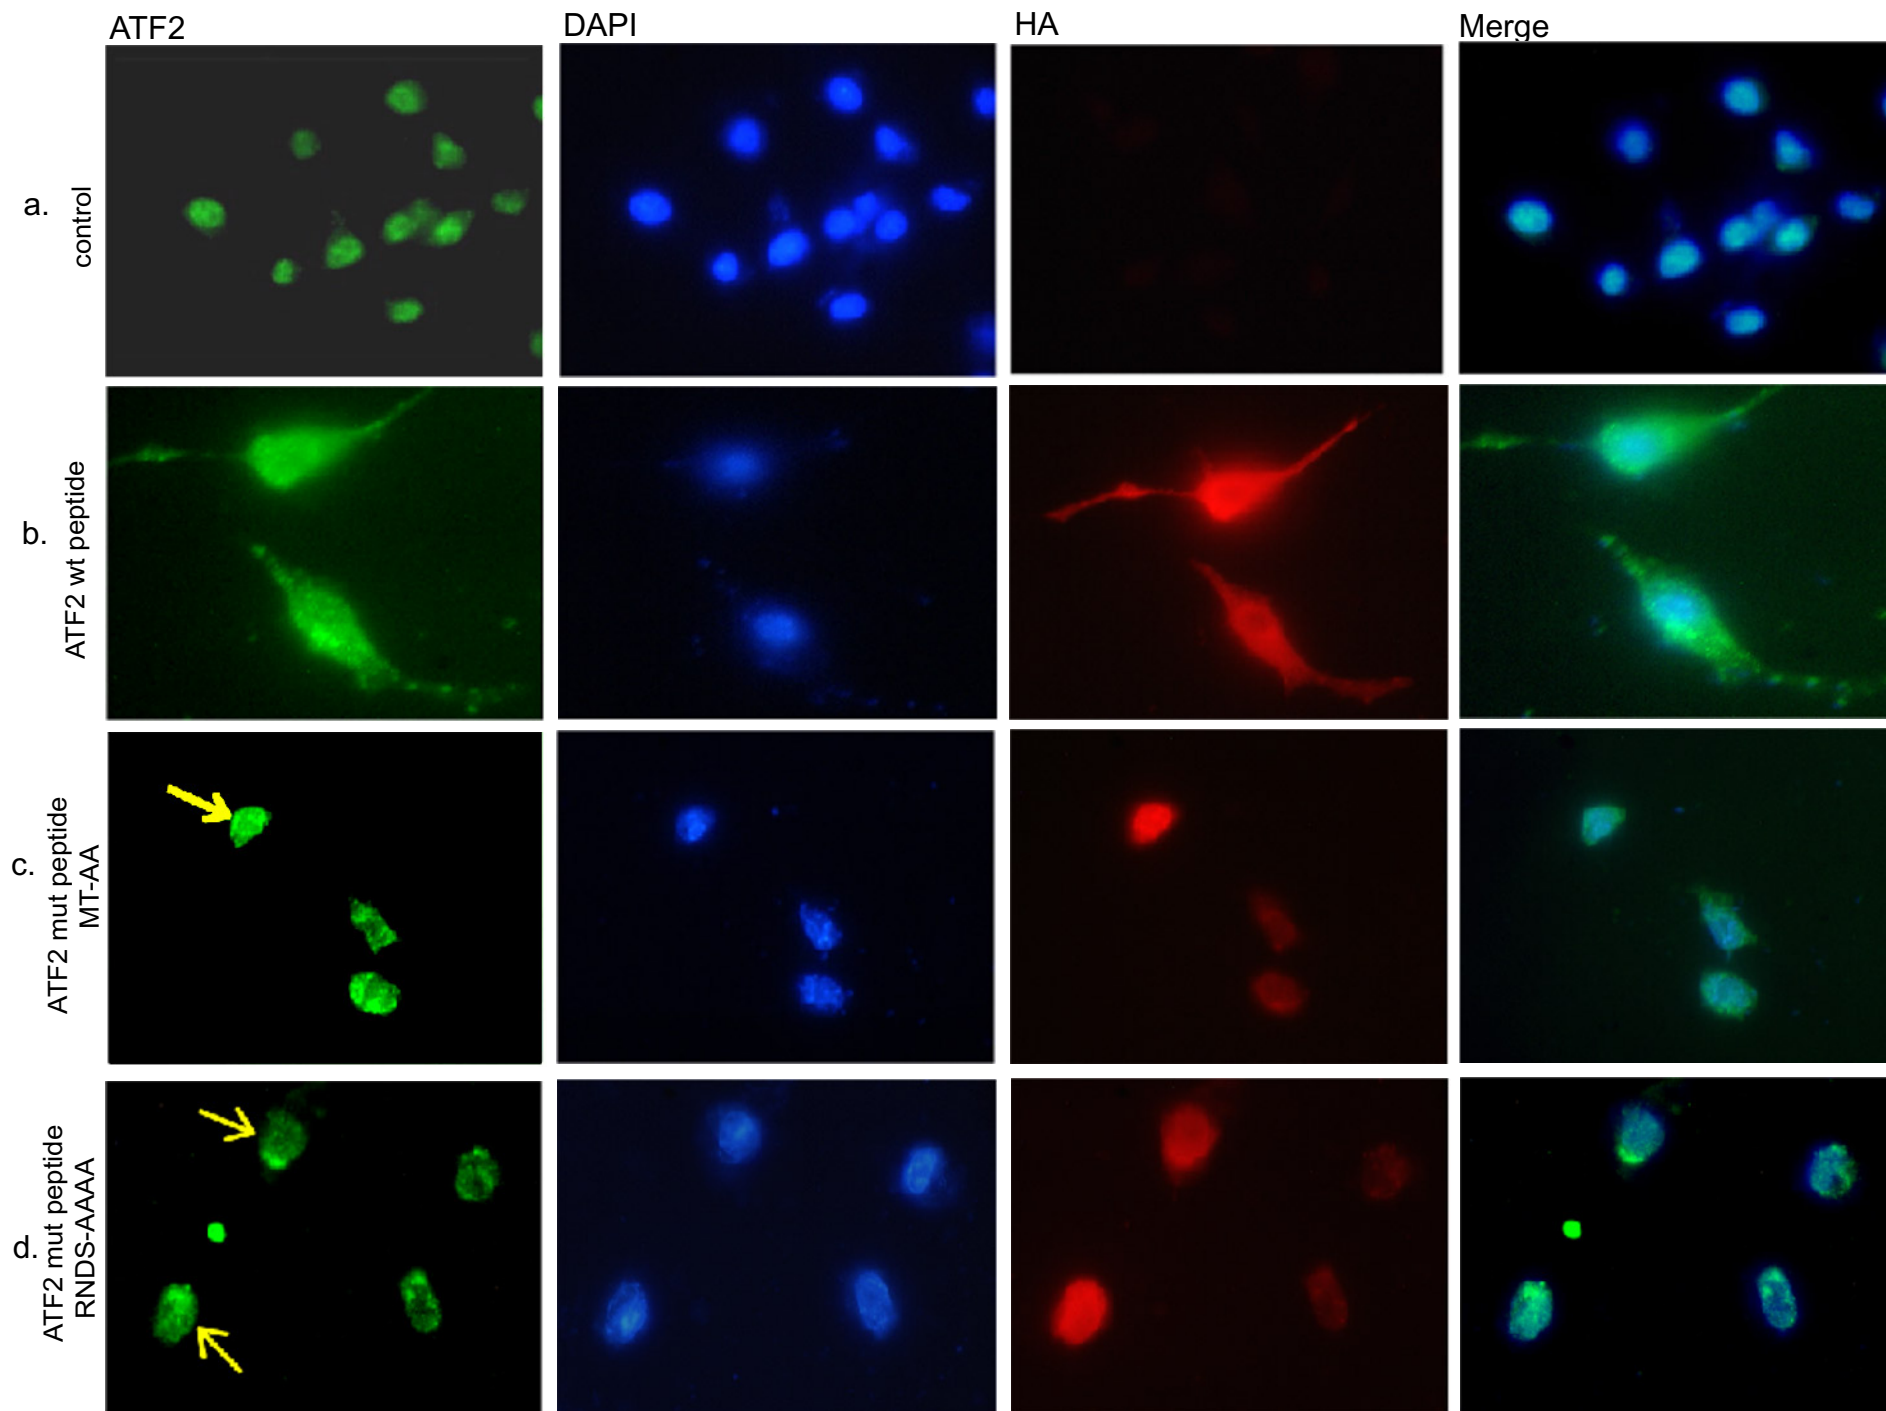

Supplement: pnas_101_12_4222__2.pdf [file pnas_101_12_4222__2.pdf]

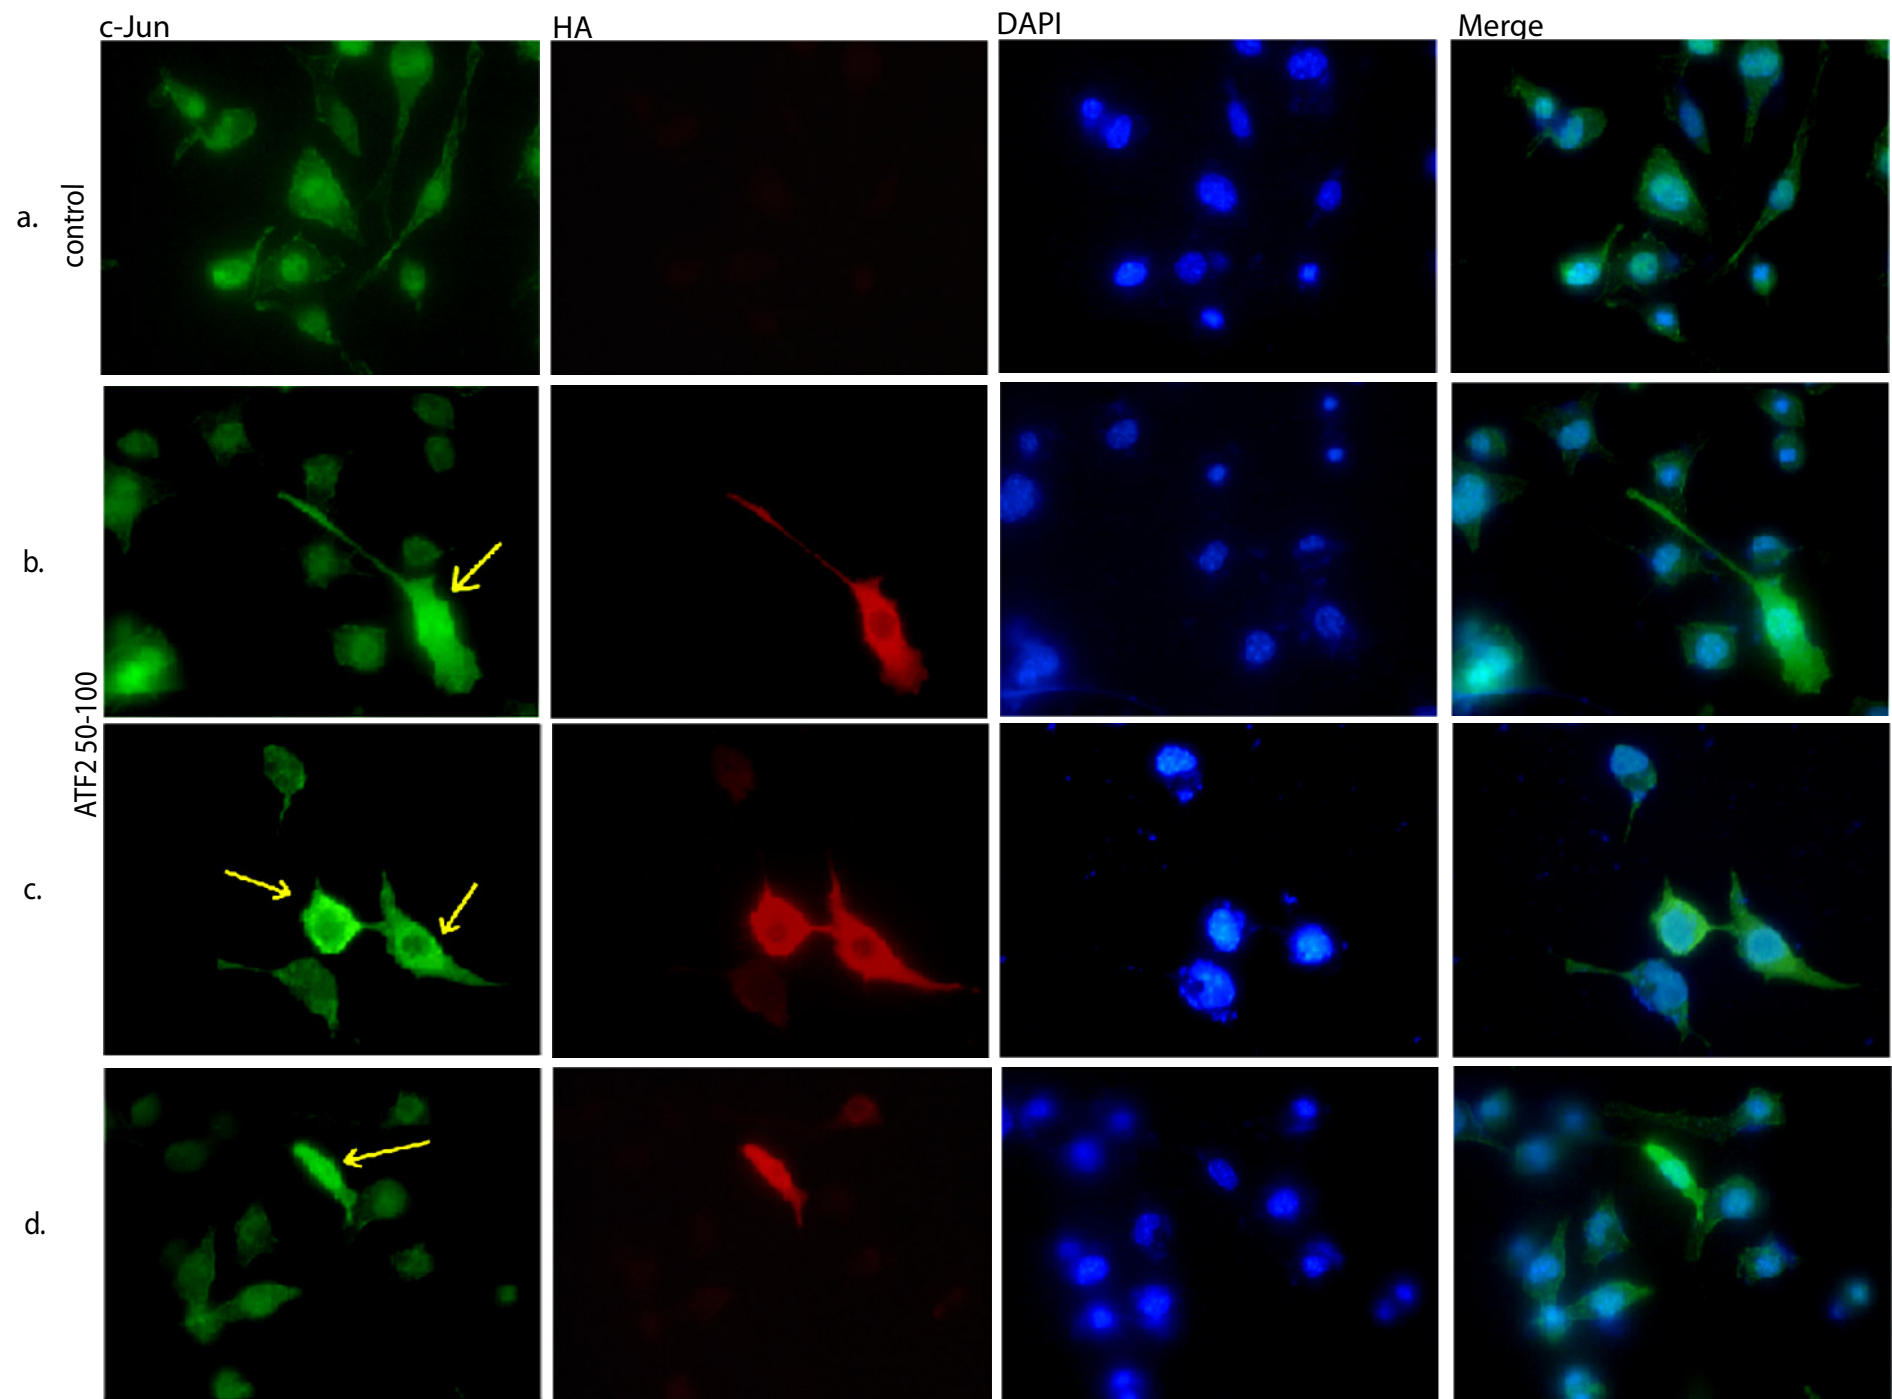

Supplement: pnas_101_12_4222__4.pdf [file pnas_101_12_4222__4.pdf]

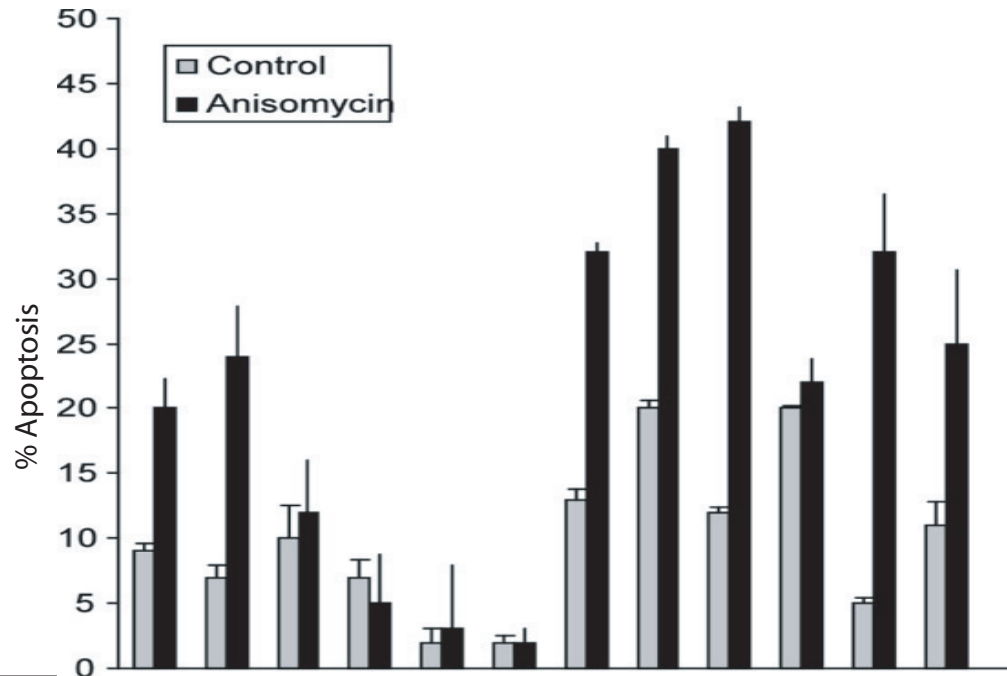

|                  |   |   |   |   |   |   |   |   |   |   |   |   |
|------------------|---|---|---|---|---|---|---|---|---|---|---|---|
| pcDNA            | + | + | + | + | + | + |   |   |   |   |   |   |
| ATF2 50-100      |   |   |   |   |   |   | + | + | + | + | + | + |
| pRS-control      | + | + | + |   |   |   | + | + | + |   |   |   |
| pRS-JunD         |   |   |   | + | + | + |   |   |   | + | + | + |
| PEF(0.5ug)       | + |   |   | + |   |   | + |   |   | + |   |   |
| WT ATF2(0.5 ug)  |   | + |   |   | + |   |   | + |   |   | + |   |
| Mut ATF2(0.5 ug) |   |   | + |   |   | + |   |   | + |   |   | + |

Supplement: pnas_101_12_4222__6.pdf [file pnas_101_12_4222__6.pdf]
